# Supplementary material for: Relationship between adverse childhood experiences and Alzheimer’s disease: a systematic review and meta-analysis protocol
Source: PubMed Central journal article supplement — BMJ Open. 2021 Aug 5;11(8):e049768. doi: 10.1136/bmjopen-2021-049768 (PMC8344279; doi:10.1136/bmjopen-2021-049768), 2021-08-05
Supplement: bmjopen-2021-049768.draft_revisions.pdf [file bmjopen-2021-049768.draft_revisions.pdf]

# BMJ Open

BMJ Open is committed to open peer review. As part of this commitment we make the peer review history of every article we publish publicly available.

When an article is published we post the peer reviewers' comments and the authors' responses online. We also post the versions of the paper that were used during peer review. These are the versions that the peer review comments apply to.

The versions of the paper that follow are the versions that were submitted during the peer review process. They are not the versions of record or the final published versions. They should not be cited or distributed as the published version of this manuscript.

BMJ Open is an open access journal and the full, final, typeset and author-corrected version of record of the manuscript is available on our site with no access controls, subscription charges or pay-per-view fees (<http://bmjopen.bmj.com>).

If you have any questions on BMJ Open's open peer review process please email [info.bmjopen@bmj.com](mailto:info.bmjopen@bmj.com)

# BMJ Open

## The relationship between adverse childhood experiences and Alzheimer's disease: A systematic review and meta-analysis protocol

|                               |                                                                                                                                                                                                                                                                                                                                                                                                                                                                                                                  |
|-------------------------------|------------------------------------------------------------------------------------------------------------------------------------------------------------------------------------------------------------------------------------------------------------------------------------------------------------------------------------------------------------------------------------------------------------------------------------------------------------------------------------------------------------------|
| Journal:                      | <i>BMJ Open</i>                                                                                                                                                                                                                                                                                                                                                                                                                                                                                                  |
| Manuscript ID                 | bmjopen-2021-049768                                                                                                                                                                                                                                                                                                                                                                                                                                                                                              |
| Article Type:                 | Protocol                                                                                                                                                                                                                                                                                                                                                                                                                                                                                                         |
| Date Submitted by the Author: | 08-Feb-2021                                                                                                                                                                                                                                                                                                                                                                                                                                                                                                      |
| Complete List of Authors:     | Corney, Kayla; Deakin University Faculty of Health, School of Medicine Pasco, J; Deakin University Faculty of Health, School of Medicine Stuart, Amanda; Deakin University Faculty of Health, School of Medicine West, Emma; Deakin University Faculty of Health, School of Medicine Quirk, Shae; Deakin University Faculty of Health, School of Medicine Azimi Manavi, Behnaz; Deakin University Faculty of Health, School of Medicine, Williams, Lana; Deakin University Faculty of Health, School of Medicine |
| Keywords:                     | Dementia < NEUROLOGY, Adverse events < THERAPEUTICS, Child & adolescent psychiatry < PSYCHIATRY                                                                                                                                                                                                                                                                                                                                                                                                                  |
|                               |                                                                                                                                                                                                                                                                                                                                                                                                                                                                                                                  |

SCHOLARONE™  
Manuscripts

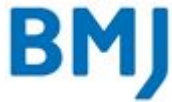

I, the Submitting Author has the right to grant and does grant on behalf of all authors of the Work (as defined in the below author licence), an exclusive licence and/or a non-exclusive licence for contributions from authors who are: i) UK Crown employees; ii) where BMJ has agreed a CC-BY licence shall apply, and/or iii) in accordance with the terms applicable for US Federal Government officers or employees acting as part of their official duties; on a worldwide, perpetual, irrevocable, royalty-free basis to BMJ Publishing Group Ltd ("BMJ") its licensees and where the relevant Journal is co-owned by BMJ to the co-owners of the Journal, to publish the Work in this journal and any other BMJ products and to exploit all rights, as set out in our [licence](#).

The Submitting Author accepts and understands that any supply made under these terms is made by BMJ to the Submitting Author unless you are acting as an employee on behalf of your employer or a postgraduate student of an affiliated institution which is paying any applicable article publishing charge ("APC") for Open Access articles. Where the Submitting Author wishes to make the Work available on an Open Access basis (and intends to pay the relevant APC), the terms of reuse of such Open Access shall be governed by a Creative Commons licence – details of these licences and which [Creative Commons](#) licence will apply to this Work are set out in our licence referred to above.

Other than as permitted in any relevant BMJ Author's Self Archiving Policies, I confirm this Work has not been accepted for publication elsewhere, is not being considered for publication elsewhere and does not duplicate material already published. I confirm all authors consent to publication of this Work and authorise the granting of this licence.

1  
2  
3 **The relationship between adverse childhood experiences and Alzheimer's disease: A**  
4 **systematic review and meta-analysis protocol**  
5  
6  
7  
8  
9

10 **Kayla B Corney<sup>1</sup>, Julie A Pasco<sup>1,2,3</sup>, Amanda L Stuart<sup>1</sup>, Emma C West<sup>1</sup>, Shae E**  
11 **Quirk<sup>1,4</sup>, Behnaz Azimi Manavi<sup>1</sup>, Lana J Williams<sup>1,2</sup>**  
12  
13  
14  
15  
16

17 *<sup>1</sup>Deakin University, IMPACT - Institute for Mental and Physical Health and Clinical*  
18 *Translation, School of Medicine, Deakin University, Melbourne, Australia*  
19

20 *<sup>2</sup>Barwon Health, Geelong, Australia*  
21

22 *<sup>3</sup>Department of Medicine-Western Health, The University of Melbourne, St Albans, Australia*  
23

24 *<sup>4</sup>Institute of Clinical Medicine/Psychiatry, University of Eastern Finland, Finland*  
25  
26  
27  
28  
29

30 **Corresponding author:**  
31

32 Ms Kayla Corney  
33

34 Deakin University  
35

36 iMPACT, School of Medicine  
37

38 PO Box 281 (Barwon Health), Geelong 3220, Australia  
39

40 Tel: +61 413 461 445  
41

42 Email: corneyk@deakin.edu.au  
43  
44  
45  
46  
47  
48

49 **Text, 2573; Tables, 2**  
50  
51  
52  
53  
54  
55  
56  
57  
58  
59  
60

## **Abstract**

**Introduction:** Alzheimer's disease has a high prevalence and a substantial impact on society, as well as the individual. Findings from clinical studies to date, suggest that multiple factors are likely to contribute to the variability seen in the progression of Alzheimer's disease.

However, despite this accumulating evidence, current identified factors do not explain the full extent of disease onset. Thus, the role of additional factors needs to be explored further.

One such factor, is exposure to adverse childhood experiences. However, the degree of this association is unknown. This systematic review will examine the literature investigating the associations between adverse childhood experiences and the risk of Alzheimer's disease.

**Methods and analysis:** Articles investigating associations between exposure to adverse childhood experiences and the risk of Alzheimer's disease will be identified systematically by searching CINAHL, MEDLINE and PsycInfo using Ebscohost. The search strategy will be built combining the main key elements identified to answer the research question.

Additional outcomes of the review will include identifying differences in sex/age of exposure and number/type of adverse childhood experiences. A meta-analysis will be performed, and statistical methods will be used to identify and control for heterogeneity, if possible.

**Ethics and dissemination:** Only published data will be used for this study, thus, ethical approval will not be required. This protocol is registered with PROSPERO (CRD42020191439). Findings of the review will be published in a peer-reviewed scientific journal, and presented at national and international conferences.

**Keywords:** Adverse childhood experiences; ACEs; Alzheimer's disease; Dementia; Cognitive decline; Cognitive ageing; Ageing.

### **Strengths and Limitations**

- The approach of this review will comprehensively assess existing literature that investigates associations between adverse childhood experiences and the onset of Alzheimer's disease.
- The results of this review may aid in early diagnosis and/or treatment of Alzheimer's disease.
- A potential limitation of this review may be the lack of evidence on the different types of adverse childhood experiences and the onset of Alzheimer's disease, and there may be heterogeneity in available studies.

## **Introduction**

Healthy cognitive function represents an essential element of successful ageing.

Unfortunately, ageing is the predominant risk factor for many diseases that limit the health span [1]. Amid these, Alzheimer's disease (AD) has drawn a lot of attention due to its irreversible and incurable status [2, 3]. AD is the most common form of dementia, affecting approximately 70% of people with the disease, with late-onset AD ( $\geq 65$  years of age) being the predominant form [3]. AD typically presents as episodic memory impairment, which gradually progresses to interfere with daily activities. Memory impairment is usually followed by other cognitive domain declines which vary according to the pattern of cortical progression, including apathy, sleep disturbances, impaired spatial and temporal navigations, executive dysfunction, behavioural changes, apraxia, language difficulties, incontinence and high dependency on others [2, 4-6].

Recently, there has been extensive research into the delineating range of risk factors associated with AD such as depression, smoking, alcohol, social engagement, education, physical activity, sleep and diet [7]. Although, notwithstanding the huge research effort, many challenges associated with the development and progression of AD still remain unknown. Nonetheless, distinct pathological changes have been linked to AD, with the loss of proteostasis being the primary theory to explain AD, specifically affecting the amyloid and tau proteins, which in turn, causes a cascade of detrimental events [8]. Moreover, genetic predisposition to AD is very complex. In rare early onset AD, common genes include APP (genes encoding  $\gamma$ -secretase complex), presenelin-1 and presenelin-2 in chromosomes 21, 14 and 1, with overexpression resulting in increased A $\beta$  production. In late onset AD, apolipoprotein E series, especially APOE4, is the major genetic risk, as >60% of AD patients harbor the gene, with overexpression associated with increased brain amyloid burden [9-11].

1  
2  
3 However, despite this accumulating evidence, current identified factors do not explain the  
4 full extent of disease onset. Thus, the role of additional factors needs to be explored further.  
5  
6 One such factor, may be exposure to adverse childhood experiences (ACEs), which refers to  
7 sources of trauma or stress occurring under the age of 18. ACEs includes emotional, physical  
8 and sexual abuse, emotional and physical neglect, and household challenges, such as  
9 domestic violence, substance abuse, mental illness, criminal behaviour and parental loss  
10 (death, separation and divorce) [12].  
11  
12  
13  
14  
15  
16  
17  
18  
19  
20

21 Recently, a growing body of evidence have reported ACEs to be associated with an increased  
22 risk for cognitive decline [13-15] and AD [16]. Furthermore, ACEs have shown to be a risk  
23 factor for a number of other poor health outcomes, such as inflammation, obesity, depression  
24 and smoking, which are known risk factors for AD, and thus, ACEs may also enhance the  
25 risk of AD indirectly through other risk factors [12, 17-19]. Previous studies have reported a  
26 higher exposure of ACEs can disrupt normal psychosocial development which can lead to an  
27 enhanced risk of many poor health outcomes, and in turn, increase the risk of AD [12, 17,  
28 19]. For example, recent evidence reports that exposure to early life stress can increase the  
29 risk of poor health behaviours such as smoking or misusing alcohol. Early stressful events  
30 can also affect psychological development, increasing the risk of depression. Moreover,  
31 recent research has reported that traumatic early life experiences can change stress regulatory  
32 functions, leading to later altered stress responses [20, 21]. In this view, these mechanisms  
33 may contribute to the development of AD. However, although previous research has reported  
34 ACEs to be a risk factor for poor health, few studies have investigated the associations  
35 between ACEs and AD.  
36  
37  
38  
39  
40  
41  
42  
43  
44  
45  
46  
47  
48  
49  
50  
51  
52  
53  
54  
55  
56  
57  
58  
59  
60



1  
2  
3 Nevertheless, previous studies have reported a decline in cognition to begin years before  
4 clinical signs of AD [22]. From this prospective, the risk factors must have occurred before  
5 this antecedent period, and thus, ACEs may be a potential factor influencing the onset of AD.  
6  
7 In addition, previous evidence reports positive social factors to be protective against AD [23-  
8 26], which therefore suggests, in reverse conclusion, negative influences of ACEs.  
9  
10  
11  
12  
13  
14  
15  
16

17 In addition, the relationship between ACEs and AD may vary by age and/or sex, possibly due  
18 to age and sex differences in neurological development and stress reactions [12, 17, 27].  
19 Previous evidence reports the prevalence of ACEs increases with age, suggesting differences  
20 in age stages of a child's development may have unique associations to later adult health [12,  
21 19, 27-30]. Additionally, sex differences have been reported for adverse childhood  
22 experiences and other harmful health outcomes [19, 28-30]. Therefore, the relationship  
23 between ACEs and AD may also differ between age and/or sex.  
24  
25  
26  
27  
28  
29  
30  
31  
32  
33  
34

35 A preliminary search was conducted to determine the nature of the existing literature. To our  
36 knowledge, no previous review has synthesised the extent of evidence on what is known  
37 regarding ACEs and their relationship with AD. We aim to help close the knowledge gap, by  
38 systematically identifying and evaluating the existing literature, providing an indication of  
39 the current quality and level of evidence, and provide directions for future research on this  
40 important and sensitive topic.  
41  
42  
43  
44  
45  
46  
47  
48  
49  
50

## 51 **Objectives**

52 The primary objective is to conduct a systematic review and meta-analysis of published  
53 observational studies that examine the associations between ACEs (occurring before the age  
54 of 18 years) and the risk of AD in adulthood. Where feasible, the secondary objectives are to  
55  
56  
57  
58  
59  
60

1  
2  
3 examine potential differences between sex/age and number/types of exposures to ACEs and  
4  
5 the associated risk of Alzheimer's disease.  
6  
7  
8  
9

## 10 **Methods**

11  
12 The development of this protocol was guided by the Preferred Reporting Items for Systematic  
13  
14 Reviews and Meta-Analyses Protocols (PRISMA-P) [31].  
15  
16  
17  
18

19 **Eligibility criteria:** Studies will be considered for inclusion according to the following  
20  
21 criteria:  
22  
23  
24  
25

26 **Study designs:** Published, peer-reviewed research articles reporting on studies that are  
27  
28 longitudinal cohort, case-control and/or cross-sectional observational studies will be eligible.  
29  
30  
31  
32

33 **Participants:** Studies will be eligible if they examine participants who were exposed to any  
34  
35 ACE before the age of 18 years. There will be no other restrictions on participant  
36  
37 demographics (e.g. sex/nationality).  
38  
39  
40  
41

42 **Exposure:** Any ACEs before 18 years of age is the exposure of interest and includes [12].  
43  
44

- 45 • Emotional/physical/sexual abuse
- 46
- 47 • Emotional/physical neglect
- 48
- 49 • Household challenges, such as exposure to domestic/family/intimate violence,  
50  
51 substance abuse, mental illness, criminal behaviour and parental loss (death,  
52  
53 separation and divorce).  
54  
55  
56  
57  
58  
59  
60

1  
2  
3 **Comparison:** Studies will be eligible if they include an appropriate comparison group, such  
4  
5 as participants who were not exposed to any ACEs.  
6  
7

8  
9  
10 **Outcomes:** Studies will be eligible if they examine the population/exposure of interest in  
11  
12 relation to the risk of AD. For eligibility purposes, the diagnosis of AD must be consistent  
13  
14 with an internationally recognised clinical or diagnostic classification system such as the  
15  
16 International Classification of Diseases (ICD), Diagnostic and Statistical Manual of Mental  
17  
18 Disorders (DSM), National Institute of Neurological and Communicative Diseases and  
19  
20 Stroke/Alzheimer's Disease and Related Disorders Association (NINCDS-ADRDA criteria),  
21  
22 and/or National Institute on Aging–Alzheimer's Association (NIA-AA workgroup criteria).  
23  
24  
25

26  
27  
28 **Setting:** Participants from general and clinical populations will be eligible.  
29  
30

31  
32  
33 **Language:** Worldwide studies that are published in English will be eligible. Google  
34  
35 Translate may be considered if potentially relevant studies are identified that are published in  
36  
37 journals in languages other than English.  
38  
39

40  
41  
42 **Exclusions:** Studies that are published in a language other than English, as well as  
43  
44 randomized controlled trials will be excluded.  
45  
46

47  
48  
49 **Search strategy:** An electronic search will be performed in three research databases  
50  
51 (CINAHL, MEDLINE Complete and PsycInfo) using the Ebscohost platform to identify  
52  
53 relevant studies. To develop the search strategy, a list of relevant index terms and key words  
54  
55 were derived from the existing, relevant literature, and combined using Boolean operators,  
56  
57 truncations, and explode functions (Table 1).  
58  
59  
60

Table 1. Search terms

---

(“Child\*” OR Young\* OR Early) AND (Physical\* OR Emotion\* OR Sexual\*) AND (Abuse OR Neglect) OR (“Adverse childhood experiences” OR “Child abuse+” OR “Parental death+” OR “Child of impaired parents” OR “Divorce” OR “Domestic violence+”) OR (Parental crime OR Parental alcohol abuse OR Parental drug abuse) AND (“Alzheimer disease” OR “Dementia”)

---

In consultation with an academic librarian, the search strategy was further refined, translated accordingly for each database, then pilot tested for MEDLINE Complete, PsycInfo and CINAHL databases. A total of 781 studies were found. Complete details regarding the search strategy and results (including dates searched) will be presented in the ensuing systematic review and meta-analysis.

**Other sources:** Grey literature, such as theses and conference presentations will be searched using an adapted search in Google and will be considered for inclusion if shown to meet the eligibility criteria. The Google search may also yield additional relevant journal articles to supplement the database searching. A manual search of hand-searching the reference lists of included studies will then be performed to identify any further studies.

**Data management and selection process:** One reviewer (K.B.C) will implement the search strategy, and then import, manage and remove duplicate records using Covidence. Then, two reviewers (K.B.C, E.C.W) will independently screen the titles/abstracts according to a predetermined screening checklist. Conflicts at the screening stage between the two reviewers will be resolved through discussion with a third reviewer (L.J.W) to provide final judgement. Final inclusions will be decided by full-text reading of the articles by two

1  
2  
3 reviewers (K.B.C, E.C.W) independently, and consensus with the third reviewer (L.J.W). A  
4  
5 PRISMA flow chart of the selection process and reasons for exclusion at the full-text stage  
6  
7  
8 will be reported.  
9

10  
11  
12 **Data collection and extraction:** Pertinent data to address the study objectives will be  
13  
14 extracted from the included studies. Covidence, as well as a pre-designed form will be used  
15  
16 to extract the data, and will be pilot tested by two reviewers.  
17  
18

19  
20  
21 **Data items:** Indicative data to be extracted are as follows:  
22

- 23 • Pertinent citation/study details (e.g. author/study/year/country)
  - 24 • Study approach (e.g. aims/design/setting)
  - 25 • Participant/population information (e.g. age/sex/demographics/sample size)
  - 26 • Exposure information (e.g. number/type of ACEs/age of exposure)
  - 27 • Comparator information
  - 28 • Outcomes (e.g. diagnosis of Alzheimer's disease).
- 29  
30  
31  
32  
33  
34  
35  
36  
37  
38  
39

40 **Outcomes and prioritisation:** As per the objectives, the main outcome will be a diagnosis of  
41  
42 AD. If sufficient appropriate studies are available, we will examine differences in sex and age  
43  
44 of exposure and the number and type of adverse childhood experiences. These will be  
45  
46 described and reported in the ensuing review.  
47  
48

49  
50  
51 **Assessment of methodological quality of included studies:** Assessment of methodological  
52  
53 quality of individual studies will be performed using a modified version of the  
54  
55 methodological scoring system by [Lievence, Bierma-Zeinstra \[32\]](#). This method has been  
56  
57 undertaken and published in several reviews by the authors [[33](#), [34](#)] and protocols [[35](#), [36](#)]  
58  
59  
60

Appropriately reflecting optimal study designs, each of the eligible studies will be scored based on the methodological assessment criteria of study population, assessment of risk factor, assessment of outcome, study design, and analysis and data presentation (table 2) [32].

The methodology of eligible studies will be scored using the predetermined criteria as follows: positive (1) or negative (0).

Table 2.

Methodological quality assessment criteria, modified from Lieveense et al. [32]

| Item | Criteria                                             | C/CC/CS |
|------|------------------------------------------------------|---------|
|      | <b>Study population</b>                              |         |
| 1    | Uniform point (selection before disease was present) | C/CC/CS |
| 2    | Case and controls drawn from then same population    | CC      |
| 3    | Participation rate >80% for cases/cohort             | C/CC/CS |
| 4    | Participation rate >80% for controls                 | CC      |
|      | <b>Assessment of risk factor</b>                     |         |
| 5    | Exposure assessment blinded                          | C/CC/CS |
| 6    | Exposure measure identical for cases and controls    | CC      |
| 7    | Exposure assessed prior to outcome                   | C/CC/CS |
|      | <b>Assessment of outcome</b>                         |         |
| 8    | Outcome assessed identically in studied populations  | C/CC/CS |
| 9    | Outcome assessed reproducibly                        | C/CC/CS |
| 10   | Outcome assessed according to validated measures     | C/CC/CS |
|      | <b>Study design</b>                                  |         |
| 11   | Prospective study design used                        | C/CC    |

|    |                                       |         |
|----|---------------------------------------|---------|
| 12 | Follow up time >12 months             | C       |
| 13 | Withdrawals <20%                      | C       |
|    | <b>Analysis and data presentation</b> |         |
| 14 | Appropriate analysis techniques used  | C/CC/CS |
| 15 | Adjust for at least age and sex       | C/CC/CS |

C, applicable to cohort studies; CC, applicable to case-control studies; CS, applicable to cross-sectional studies.

**Reporting and presenting results:** The reporting of the findings from the proposed review will adhere to the PRISMA guidelines [31].

**Qualitative synthesis:** A description of all relevant studies and their methodological quality will be presented (e.g. in tables/text), and a qualitative/narrative summary of the key findings will be reported in text.

**Quantitative synthesis (meta-analysis):** Where appropriate, a quantitative synthesis will be performed using random-effects statistical models, given the expected diversity among populations/exposures of ACEs. Where possible, Odd Ratios (ORs)/Hazard Ratios (HRs) (e.g. for categorical outcome/diagnosis data) and their 95% confidence intervals (CIs) will be calculated and reported.

If sufficient data is available, we will also consider subgroup analyses of:

- Sex
- Age of exposure
- Number of ACEs
- Type of ACEs.

1  
2  
3  
4  
5 A statistician will be consulted regarding the appropriateness of assessing risk of bias,  
6 heterogeneity, and reporting bias on the included studies. Complete details will be presented  
7  
8 in the review. The findings will be published in a peer-reviewed scientific journal, and results  
9  
10 will be shared at national and international conferences.  
11  
12  
13  
14  
15  
16

17 **Dissemination:** This protocol is registered with PROSPERO (CRD42020191439), an  
18 international database of health-related systematic review protocols. The findings will be  
19 published in a peer-reviewed scientific journal, and results will be shared at national and  
20 international conferences.  
21  
22  
23  
24  
25  
26  
27

28 **Ethics:** Only published data will be included in this systematic review, therefore ethical  
29 approval will not need to be acquired.  
30  
31  
32  
33  
34

### 35 **Conclusion**

36  
37 To the best of our knowledge, this will be the first review to identify and evaluate the existing  
38 evidence regarding the associations between ACEs and the onset of AD. The findings of this  
39 review will contribute to the existing literature investigating ACEs and cognitive health, and  
40 will add to the evidence base on factors reducing the burden associated with AD.  
41  
42  
43  
44  
45  
46  
47  
48

### 49 **Footnotes**

50  
51 **Patient and Public Involvement:** Patients and the public will have no involvement in the  
52 design, or conduct, or reporting, or dissemination plans of the research.  
53  
54  
55  
56  
57  
58  
59  
60



1  
2  
3 **Contribution statement:** K.B.C, L.J.W and J.A.P planned and designed the study. K.B.C  
4 will implement the search strategy, and then import, manage and remove duplicate records  
5 using Covidence. K.B.C and E.C.W will independently screen the titles/abstracts according  
6 to a predetermined screening checklist. Conflicts at the screening stage between the two  
7 reviewers will be resolved through discussion with L.J.W to provide final judgement. Final  
8 inclusions will be decided by full-text reading of the articles by K.B.C and E.C.W  
9 independently, and consensus with L.J.W. K.B.C will analyse and interpret the data. L.J.W  
10 and J.A.P will help supervise the project. K.B.C will report and present the findings. A.L.S,  
11 S.E.Q and B.A will provide critical feedback throughout the study. All authors will contribute  
12 to the final version of the manuscript.  
13  
14  
15  
16  
17  
18  
19  
20  
21  
22  
23  
24  
25  
26  
27  
28

29 **Funding:** K.B.C is supported by the Australian Rotary Health/Bing Taylor PhD Scholarship  
30 in Dementia. L.J.W is supported by a NHMRC Investigator grant (1174060). S.E.Q is  
31 supported by the Päivikki ja Sakari Sohlbergin Säätiö. E.C.W and B.A are supported by a  
32 Deakin University Postgraduate Research Scholarship (DUPRS). The funding sources will  
33 have no role in the study design, data collection, data analysis, data interpretation, writing of  
34 the report or the decision to submit the paper for publication.  
35  
36  
37  
38  
39  
40  
41  
42  
43  
44

45 **Conflicts of interest:** None declared.  
46  
47  
48  
49  
50  
51  
52  
53  
54  
55  
56  
57  
58  
59  
60

## References

1. Franceschi, C., et al., *The Continuum of Aging and Age-Related Diseases: Common Mechanisms but Different Rates*. Front Med (Lausanne), 2018. **5**: p. 61.
2. Blazer, D.G., K. Yaffe, and C.T. Liverman, *Cognitive Aging: Progress in Understanding and Opportunities for Action (2015)*, in *Cognitive Aging: Progress in Understanding and Opportunities for Action*, D.G. Blazer, K. Yaffe, and C.T. Liverman, Editors. 2015, Committee on the Public Health Dimensions of Cognitive Aging, Board on Health Sciences Policy: Washington (DC).
3. Thies, W. and L. Bleiler, *2013 Alzheimer's disease facts and figures*. The Journal of Alzheimer's Association, 2013. **9**(2): p. 208-45.
4. Bahnasy, W.S., Y.A. El-Heneedy, and E.A. El-Seidy, *Sex Hormones and Alzheimer's Disease*, in *Sex Hormones in Neurodegenerative Processes and Diseases*. 2018.
5. Buchhave, P., et al., *Cerebrospinal Fluid Levels of  $\beta$ -Amyloid 1-42, but Not of Tau, Are Fully Changed Already 5 to 10 Years Before the Onset of Alzheimer Dementia*. Archives of General Psychiatry, 2011. **69**(1): p. 98-106.
6. Lane, C.A., J. Hardy, and J.M. Schott, *Alzheimer's disease*. Eur J Neurol, 2018. **25**(1): p. 59-70.
7. Baumgart, M., et al., *Summary of the evidence on modifiable risk factors for cognitive decline and dementia: A population-based perspective*. Alzheimers Dement, 2015. **11**(6): p. 718-26.
8. Kametani, F. and M. Hasegawa, *Reconsideration of Amyloid Hypothesis and Tau Hypothesis in Alzheimer's Disease*. Front Neurosci, 2018. **12**: p. 25.
9. Simic, G., et al., *Monoaminergic neuropathology in Alzheimer's disease*. Prog Neurobiol, 2017. **151**: p. 101-138.

- 1  
2  
3 10. Theendakara, V., et al., *Direct Transcriptional Effects of Apolipoprotein E*. J  
4 Neurosci, 2016. **36**(3): p. 685-700.  
5  
6
- 7  
8 11. Shamsi, M.B., et al., *Epigenetics of human diseases and scope in future therapeutics*.  
9 J Taibah Univ Med Sci, 2017. **12**(3): p. 205-211.  
10
- 11  
12 12. Felitti, V.J., et al., *Relationship of childhood abuse and household dysfunction to*  
13 *many of the leading causes of death in adults. The Adverse Childhood Experiences*  
14 *(ACE) Study*. . American Journal of Preventative medicine, 1998. **14**(4): p. 245-258.  
15  
16
- 17  
18 13. Korten, N.C., et al., *Adverse Childhood and Recent Negative Life Events: Contrasting*  
19 *Associations With Cognitive Decline in Older Persons*. J Geriatr Psychiatry Neurol,  
20 2014. **27**(2): p. 128-38.  
21  
22
- 23  
24 14. Richards, M. and M.E. Wadsworth, *Long term effects of early adversity on cognitive*  
25 *function*. Arch Dis Child, 2004. **89**(10): p. 922-7.  
26  
27
- 28  
29 15. Ritchie, K., et al., *Adverse childhood environment and late-life cognitive functioning*.  
30 Int J Geriatr Psychiatry, 2011. **26**(5): p. 503-10.  
31  
32
- 33  
34 16. Norton, M.C., et al., *Early parental death and remarriage of widowed parents as risk*  
35 *factors for Alzheimer disease: the Cache County study*. Am J Geriatr Psychiatry,  
36 2011. **19**(9): p. 814-24.  
37  
38
- 39  
40 17. Danese, A., et al., *Adverse childhood experiences and adult risk factors for age-*  
41 *related disease: depression, inflammation, and clustering of metabolic risk markers*. .  
42 Archives of Paediatric & Adolescent Medicine, 2009. **163**(12): p. 1135-1143.  
43  
44
- 45  
46 18. Chapman, D.P., et al., *Adverse childhood experiences and the risk of depressive*  
47 *disorders in adulthood*. J Affect Disord, 2004. **82**(2): p. 217-25.  
48  
49
- 50  
51 19. Tani, Y., T. Fujiwara, and K. Kondo, *Association Between Adverse Childhood*  
52 *Experiences and Dementia in Older Japanese Adults*. JAMA Netw Open, 2020. **3**(2):  
53 p. e1920740.  
54  
55  
56  
57  
58  
59  
60

- 1  
2  
3 20. De Bellis, M.D. and A. Zisk, *The biological effects of childhood trauma*. Child  
4 Adolesc Psychiatr Clin N Am, 2014. **23**(2): p. 185-222, vii.  
5  
6  
7  
8 21. Fink, D.S. and S. Galea, *Life course epidemiology of trauma and related*  
9 *psychopathology in civilian populations*. Curr Psychiatry Rep, 2015. **17**(5): p. 31.  
10  
11  
12 22. Shea, T.B., *While I Still Remember: 30 Years of Alzheimer's Disease Research*. J  
13 Alzheimers Dis, 2018. **62**(3): p. 1049-1057.  
14  
15  
16  
17 23. Lemche, E., *Early Life Stress and Epigenetics in Late-onset Alzheimer's Dementia: A*  
18 *Systematic Review*. Curr Genomics, 2018. **19**(7): p. 522-602.  
19  
20  
21 24. Khondoker, M., et al., *Positive and Negative Experiences of Social Support and Risk*  
22 *of Dementia in Later Life: An Investigation Using the English Longitudinal Study of*  
23 *Ageing*. J Alzheimers Dis, 2017. **58**(1): p. 99-108.  
24  
25  
26  
27  
28 25. Mortimer, J.A., et al., *Changes in brain volume and cognition in a randomized trial of*  
29 *exercise and social interaction in a community-based sample of non-demented*  
30 *Chinese elders*. J Alzheimers Dis, 2012. **30**(4): p. 757-66.  
31  
32  
33  
34  
35 26. Evans, I.E.M., et al., *Social Isolation and Cognitive Function in Later Life: A*  
36 *Systematic Review and Meta-Analysis*. J Alzheimers Dis, 2019. **70**(s1): p. S119-S144.  
37  
38  
39  
40 27. Hughes, K., et al., *The effect of multiple adverse childhood experiences on health: a*  
41 *systematic review and meta-analysis*. The Lancet Public Health, 2017. **2**(8): p. e356-  
42 e366.  
43  
44  
45  
46  
47 28. Chartier, M.J., J.R. Walker, and B. Naimark, *Separate and cumulative effects of*  
48 *adverse childhood experiences in predicting adult health and health care utilization*.  
49 Child Abuse Negl, 2010. **34**(6): p. 454-64.  
50  
51  
52  
53  
54 29. Flaherty, E.G., Thompson, R., Dubowitz, H., Harvey, E. M., English, D. J., Proctor,  
55 L. J., & Runyan, D. K. , *Adverse childhood experiences and child health in early*  
56 *adolescence*. JAMA Paediatrics, 2013. **167**(7): p. 622-629.  
57  
58  
59  
60

- 1  
2  
3 30. Flaherty, E.G., et al., *Effect of early childhood adversity on child health*. Archives of  
4 Pediatric & Adolescent Medicine, 2006. **160**(12): p. 1232-1238.  
5  
6  
7  
8 31. Moher, D., et al., *Preferred reporting items for systematic reviews and meta-analyses:*  
9 *the PRISMA statement*. PLoS Med, 2009. **6**(7): p. e1000097.  
10  
11  
12 32. Lieveense, A., et al., *Influence of Work on the Development of Osteoarthritis of the*  
13 *Hip: A Systematic Review*. The Journal of Rheumatology 2001. **28**(11): p. 2520-8.  
14  
15  
16 33. Shae E Quirk, L.J.W., Adrienne O'Neil, Julie A Pasco, Felice N Jacka, Siobhan  
17 Housden, Michael Berk, and Sharon L Brennan, *The association between diet quality,*  
18 *dietary*  
19 *patterns and depression in adults: a systematic*  
20 *review*. BMC Psychiatry, 2013. **13**(175).  
21  
22  
23  
24  
25  
26  
27  
28 34. Adrienne O'Neil, S.E.Q., Siobhan Housden, Sharon L. Brennan, Lana J. Williams,  
29 Julie A. Pasco, Michael Berk, and Felice N. Jacka, *Relationship Between Diet and*  
30 *Mental Health in Children*  
31 *and Adolescents: A Systematic Review*. American Journal of Public Health, 2014. **104**(10).  
32  
33  
34  
35  
36  
37  
38 35. Chandrasekaran, V., et al., *Association between bipolar spectrum disorder and bone*  
39 *health: a meta-analysis and systematic review protocol*. BMJ Open, 2017. **7**(2): p.  
40 e013981.  
41  
42  
43  
44  
45 36. Green, D., et al., *Is there a social gradient of sarcopenia? A meta-analysis and*  
46 *systematic review protocol*. BMJ Open, 2018. **8**(1): p. e019088.  
47  
48  
49  
50  
51  
52  
53  
54  
55  
56  
57  
58  
59  
60

**PRISMA-P (Preferred Reporting Items for Systematic review and Meta-Analysis Protocols) 2015 checklist: recommended items to address in a systematic review protocol\***

| Section and topic                 | Item No | Checklist item                                                                                                                                                                                                                |
|-----------------------------------|---------|-------------------------------------------------------------------------------------------------------------------------------------------------------------------------------------------------------------------------------|
| <b>ADMINISTRATIVE INFORMATION</b> |         |                                                                                                                                                                                                                               |
| Title:                            |         |                                                                                                                                                                                                                               |
| Identification                    | 1a      | Identify the report as a protocol of a systematic review                                                                                                                                                                      |
| Update                            | 1b      | If the protocol is for an update of a previous systematic review, identify as such                                                                                                                                            |
| Registration                      | 2       | If registered, provide the name of the registry (such as PROSPERO) and registration number                                                                                                                                    |
| Authors:                          |         |                                                                                                                                                                                                                               |
| Contact                           | 3a      | Provide name, institutional affiliation, e-mail address of all protocol authors; provide physical mailing address of corresponding author                                                                                     |
| Contributions                     | 3b      | Describe contributions of protocol authors and identify the guarantor of the review                                                                                                                                           |
| Amendments                        | 4       | If the protocol represents an amendment of a previously completed or published protocol, identify as such and list changes; otherwise, state plan for documenting important protocol amendments                               |
| Support:                          |         |                                                                                                                                                                                                                               |
| Sources                           | 5a      | Indicate sources of financial or other support for the review                                                                                                                                                                 |
| Sponsor                           | 5b      | Provide name for the review funder and/or sponsor                                                                                                                                                                             |
| Role of sponsor or funder         | 5c      | Describe roles of funder(s), sponsor(s), and/or institution(s), if any, in developing the protocol                                                                                                                            |
| <b>INTRODUCTION</b>               |         |                                                                                                                                                                                                                               |
| Rationale                         | 6       | Describe the rationale for the review in the context of what is already known                                                                                                                                                 |
| Objectives                        | 7       | Provide an explicit statement of the question(s) the review will address with reference to participants, interventions, comparators, and outcomes (PICO)                                                                      |
| <b>METHODS</b>                    |         |                                                                                                                                                                                                                               |
| Eligibility criteria              | 8       | Specify the study characteristics (such as PICO, study design, setting, time frame) and report characteristics (such as years considered, language, publication status) to be used as criteria for eligibility for the review |
| Information sources               | 9       | Describe all intended information sources (such as electronic databases, contact with study authors, trial registers or other grey literature sources) with planned dates of coverage                                         |
| Search strategy                   | 10      | Present draft of search strategy to be used for at least one electronic database, including planned limits, such that it could be repeated                                                                                    |
| Study records:                    |         |                                                                                                                                                                                                                               |
| Data management                   | 11a     | Describe the mechanism(s) that will be used to manage records and data throughout the review                                                                                                                                  |

|    |                                    |     |                                                                                                                                                                                                                                                  |
|----|------------------------------------|-----|--------------------------------------------------------------------------------------------------------------------------------------------------------------------------------------------------------------------------------------------------|
| 1  |                                    |     |                                                                                                                                                                                                                                                  |
| 2  |                                    |     |                                                                                                                                                                                                                                                  |
| 3  | Selection process                  | 11b | State the process that will be used for selecting studies (such as two independent reviewers) through each phase of the review (that is, screening, eligibility and inclusion in meta-analysis)                                                  |
| 4  |                                    |     |                                                                                                                                                                                                                                                  |
| 5  | Data collection process            | 11c | Describe planned method of extracting data from reports (such as piloting forms, done independently, in duplicate), any processes for obtaining and confirming data from investigators                                                           |
| 6  |                                    |     |                                                                                                                                                                                                                                                  |
| 7  | Data items                         | 12  | List and define all variables for which data will be sought (such as PICO items, funding sources), any pre-planned data assumptions and simplifications                                                                                          |
| 8  |                                    |     |                                                                                                                                                                                                                                                  |
| 9  | Outcomes and prioritization        | 13  | List and define all outcomes for which data will be sought, including prioritization of main and additional outcomes, with rationale                                                                                                             |
| 10 |                                    |     |                                                                                                                                                                                                                                                  |
| 11 | Risk of bias in individual studies | 14  | Describe anticipated methods for assessing risk of bias of individual studies, including whether this will be done at the outcome or study level, or both; state how this information will be used in data synthesis                             |
| 12 |                                    |     |                                                                                                                                                                                                                                                  |
| 13 | Data synthesis                     | 15a | Describe criteria under which study data will be quantitatively synthesised                                                                                                                                                                      |
| 14 |                                    | 15b | If data are appropriate for quantitative synthesis, describe planned summary measures, methods of handling data and methods of combining data from studies, including any planned exploration of consistency (such as $I^2$ , Kendall's $\tau$ ) |
| 15 |                                    | 15c | Describe any proposed additional analyses (such as sensitivity or subgroup analyses, meta-regression)                                                                                                                                            |
| 16 |                                    | 15d | If quantitative synthesis is not appropriate, describe the type of summary planned                                                                                                                                                               |
| 17 |                                    |     |                                                                                                                                                                                                                                                  |
| 18 | Meta-bias(es)                      | 16  | Specify any planned assessment of meta-bias(es) (such as publication bias across studies, selective reporting within studies)                                                                                                                    |
| 19 |                                    |     |                                                                                                                                                                                                                                                  |
| 20 | Confidence in cumulative evidence  | 17  | Describe how the strength of the body of evidence will be assessed (such as GRADE)                                                                                                                                                               |
| 21 |                                    |     |                                                                                                                                                                                                                                                  |

**\* It is strongly recommended that this checklist be read in conjunction with the PRISMA-P Explanation and Elaboration (cite when available) for important clarification on the items. Amendments to a review protocol should be tracked and dated. The copyright for PRISMA-P (including checklist) is held by the PRISMA-P Group and is distributed under a Creative Commons Attribution Licence 4.0.**

*From: Shamseer L, Moher D, Clarke M, Ghersi D, Liberati A, Petticrew M, Shekelle P, Stewart L, PRISMA-P Group. Preferred reporting items for systematic review and meta-analysis protocols (PRISMA-P) 2015: elaboration and explanation. BMJ. 2015 Jan 2;349(jan02 1):g7647.*

# BMJ Open

## The relationship between adverse childhood experiences and Alzheimer's disease: A systematic review and meta-analysis protocol

|                                 |                                                                                                                                                                                                                                                                                                                                                                                                                                                                                                                  |
|---------------------------------|------------------------------------------------------------------------------------------------------------------------------------------------------------------------------------------------------------------------------------------------------------------------------------------------------------------------------------------------------------------------------------------------------------------------------------------------------------------------------------------------------------------|
| Journal:                        | <i>BMJ Open</i>                                                                                                                                                                                                                                                                                                                                                                                                                                                                                                  |
| Manuscript ID                   | bmjopen-2021-049768.R1                                                                                                                                                                                                                                                                                                                                                                                                                                                                                           |
| Article Type:                   | Protocol                                                                                                                                                                                                                                                                                                                                                                                                                                                                                                         |
| Date Submitted by the Author:   | 07-Jun-2021                                                                                                                                                                                                                                                                                                                                                                                                                                                                                                      |
| Complete List of Authors:       | Corney, Kayla; Deakin University Faculty of Health, School of Medicine Pasco, J; Deakin University Faculty of Health, School of Medicine Stuart, Amanda; Deakin University Faculty of Health, School of Medicine West, Emma; Deakin University Faculty of Health, School of Medicine Quirk, Shae; Deakin University Faculty of Health, School of Medicine Azimi Manavi, Behnaz; Deakin University Faculty of Health, School of Medicine, Williams, Lana; Deakin University Faculty of Health, School of Medicine |
| <b>Primary Subject Heading</b>: | Neurology                                                                                                                                                                                                                                                                                                                                                                                                                                                                                                        |
| Secondary Subject Heading:      | Mental health, Public health                                                                                                                                                                                                                                                                                                                                                                                                                                                                                     |
| Keywords:                       | Dementia < NEUROLOGY, Adverse events < THERAPEUTICS, Child & adolescent psychiatry < PSYCHIATRY                                                                                                                                                                                                                                                                                                                                                                                                                  |
|                                 |                                                                                                                                                                                                                                                                                                                                                                                                                                                                                                                  |

SCHOLARONE™  
Manuscripts





I, the Submitting Author has the right to grant and does grant on behalf of all authors of the Work (as defined in the below author licence), an exclusive licence and/or a non-exclusive licence for contributions from authors who are: i) UK Crown employees; ii) where BMJ has agreed a CC-BY licence shall apply, and/or iii) in accordance with the terms applicable for US Federal Government officers or employees acting as part of their official duties; on a worldwide, perpetual, irrevocable, royalty-free basis to BMJ Publishing Group Ltd ("BMJ") its licensees and where the relevant Journal is co-owned by BMJ to the co-owners of the Journal, to publish the Work in this journal and any other BMJ products and to exploit all rights, as set out in our [licence](#).

The Submitting Author accepts and understands that any supply made under these terms is made by BMJ to the Submitting Author unless you are acting as an employee on behalf of your employer or a postgraduate student of an affiliated institution which is paying any applicable article publishing charge ("APC") for Open Access articles. Where the Submitting Author wishes to make the Work available on an Open Access basis (and intends to pay the relevant APC), the terms of reuse of such Open Access shall be governed by a Creative Commons licence – details of these licences and which [Creative Commons](#) licence will apply to this Work are set out in our licence referred to above.

Other than as permitted in any relevant BMJ Author's Self Archiving Policies, I confirm this Work has not been accepted for publication elsewhere, is not being considered for publication elsewhere and does not duplicate material already published. I confirm all authors consent to publication of this Work and authorise the granting of this licence.

1  
2  
3 **The relationship between adverse childhood experiences and Alzheimer's disease: A**  
4  
5 **systematic review and meta-analysis protocol**  
6  
7  
8  
9

10 **Kayla B Corney<sup>1</sup>, Julie A Pasco<sup>1,2,3</sup>, Amanda L Stuart<sup>1</sup>, Emma C West<sup>1</sup>, Shae E**  
11  
12 **Quirk<sup>1,4</sup>, Behnaz Azimi Manavi<sup>1</sup>, Lana J Williams<sup>1,2</sup>**  
13  
14  
15  
16

17 *<sup>1</sup>Deakin University, IMPACT - Institute for Mental and Physical Health and Clinical*  
18 *Translation, School of Medicine, Deakin University, Melbourne, Australia*  
19

20  
21 *<sup>2</sup>Barwon Health, Geelong, Australia*  
22

23  
24 *<sup>3</sup>Department of Medicine-Western Health, The University of Melbourne, St Albans, Australia*  
25

26 *<sup>4</sup>Institute of Clinical Medicine/Psychiatry, University of Eastern Finland, Finland*  
27  
28  
29

30  
31 **Corresponding author:**  
32

33 Ms Kayla Brooke Corney  
34

35 Deakin University  
36

37 IMPACT, School of Medicine  
38

39 PO Box 281 (Barwon Health), Geelong 3220, Australia  
40

41 Email: corneyk@deakin.edu.au  
42  
43  
44  
45  
46  
47  
48  
49  
50  
51  
52  
53  
54  
55  
56  
57  
58  
59  
60

**Text, 2238; Tables, 1**

## **Abstract**

**Introduction:** Alzheimer's disease has a high prevalence and a substantial impact on society, as well as the individual. Findings from clinical studies to date, suggest that multiple factors are likely to contribute to the variability seen in the progression of Alzheimer's disease. However, despite this accumulating evidence, current identified factors do not explain the full extent of disease onset. Thus, the role of additional factors needs to be explored further. One such factor is exposure to adverse childhood experiences. However, the degree of this association is unknown. This systematic review will examine the literature investigating the associations between adverse childhood experiences and the risk of Alzheimer's disease.

**Methods and analysis:** Articles investigating associations between exposure to adverse childhood experiences and the risk of Alzheimer's disease will be identified systematically by searching CINAHL, MEDLINE and PsycInfo using Ebscohost. No restrictions on date of publication will be applied. The search strategy will be built combining the main key elements of the Population, Exposure, Comparator, and Outcomes (PECO) inclusion criteria. A meta-analysis is planned and statistical methods will be used to identify and control for heterogeneity, if possible. The development of this protocol was guided by the Preferred Reporting Items for Systematic Reviews and Meta-Analyses Protocols.

**Ethics and dissemination:** Only published data will be used for this study, thus, ethical approval will not be required. This protocol is registered with PROSPERO (CRD42020191439). Findings of the review will be published in a peer-reviewed scientific journal, and presented at national and international conferences.

1  
2  
3 **Keywords:** Adverse childhood experiences; ACEs; Alzheimer's disease; Dementia; Cognitive  
4  
5 decline; Cognitive ageing; Ageing.  
6  
7  
8  
9  
10  
11  
12  
13  
14  
15  
16  
17  
18  
19  
20  
21  
22  
23  
24  
25  
26  
27  
28  
29  
30  
31  
32  
33  
34  
35  
36  
37  
38  
39  
40  
41  
42  
43  
44  
45  
46  
47  
48  
49  
50  
51  
52  
53  
54  
55  
56  
57  
58  
59  
60

For peer review only

### **Strengths and Limitations**

- The approach of this review will comprehensively assess existing literature that investigates associations between adverse childhood experiences and the onset of Alzheimer's disease.
- A rigorous search of multiple databases (i.e. CINAHL, MEDLINE and PsycInfo) to ensure a comprehensive review will be conducted.
- This review will be guided by robust guidelines, and a validated tool will be used to assess the quality of included articles to minimise bias.
- Two independent reviewers will perform the screening process, extract the data and perform quality assessment.
- A potential limitation of this review may be the lack of evidence on the different types of adverse childhood experiences and the risk of Alzheimer's disease, and there may be heterogeneity in available studies.

## **Introduction**

Healthy cognitive function represents an essential element of successful ageing.

Unfortunately, ageing is the predominant risk factor for many diseases that limit the health span [1]. Amid these, Alzheimer's disease (AD) has drawn a lot of attention due to its irreversible and incurable status [2, 3]. AD is the most common form of dementia, affecting approximately 70% of people with the disease, with late-onset AD ( $\geq 65$  years of age) being the predominant form [3]. AD typically presents as episodic memory impairment, which gradually progresses to interfere with daily activities. Memory impairment is usually followed by other cognitive domain declines which vary according to disease progression, including apathy, impaired spatial and temporal navigations, executive dysfunction, behavioural changes, apraxia, language difficulties, and high dependency on others [2, 4-6].

Recently, there has been extensive research into the delineating range of risk factors associated with AD such as smoking, social engagement, education, physical activity, sleep and diet [7]. Although, notwithstanding the huge research effort, many challengers associated with the development and progression of AD remain unknown. Nonetheless, distinct pathological changes have been linked to AD, with impairment of proteostasis being the primary theory to explain AD, specifically affecting the amyloid and tau proteins, which in turn, causes a cascade of detrimental events [8, 9]. Moreover, genetic predisposition to AD is very complex. In rare early onset AD, common genes include APP (genes encoding  $\gamma$ -secretase complex), presenelin-1 and presenelin-2 in chromosomes 21, 14 and 1, and in late onset AD, apolipoprotein E series, especially APOE4, is the major genetic risk, with overexpression associated with increased amyloid burden [10-12]. However, despite this accumulating evidence, current identified factors do not explain the full extent of disease onset. Thus, the role of additional factors needs to be explored further. One such factor, may be exposure to

1  
2  
3 adverse childhood experiences (ACEs), which refers to sources of trauma or stress occurring  
4 under the age of 18. ACEs includes emotional, physical and sexual abuse, emotional and  
5 physical neglect, and household challenges, such as domestic violence, substance abuse,  
6  
7 mental illness, criminal behaviour and parental loss (death, separation and divorce) [13].  
8  
9  
10  
11  
12  
13

14 Recently, a growing body of evidence have reported ACEs to be associated with an increased  
15 risk for cognitive decline [14-16] and AD [17]. Furthermore, ACEs have shown to be a risk  
16 factor for a number of other poor health outcomes, such as inflammation, obesity, depression  
17 and smoking, which are known risk factors for AD, and thus, ACEs may also enhance the  
18 risk of AD indirectly through other risk factors [13, 18-20]. Furthermore, previous studies  
19 have reported a higher exposure of ACEs can disrupt normal psychosocial development  
20 which can lead to an enhanced risk of many poor health outcomes, such as smoking,  
21 misusing alcohol, and increase depression and anxiety symptomology, and in turn, increase  
22 the risk of AD [13, 18, 20, 21]. Moreover, recent research has reported that traumatic early  
23 life experiences can change stress regulatory functions, leading to later altered stress  
24 responses [22, 23]. Increased stress levels are reported to increase amyloid burden, thus  
25 increasing cognitive decline prior to AD progression [21]. Therefore, ACEs, in conjunction  
26 with other biological, psychological and environmental factors that initiate a stress response,  
27 could impact the risk of AD.  
28  
29  
30  
31  
32  
33  
34  
35  
36  
37  
38  
39  
40  
41  
42  
43  
44  
45  
46  
47  
48

49 However, although previous research has reported ACEs to be a risk factor for poor health,  
50 few studies have investigated the associations between ACEs and AD. Nevertheless, previous  
51 studies have reported a decline in cognition to begin years before clinical signs of AD [24].  
52 From this perspective, the risk factors must have occurred before this antecedent period, and  
53 thus, ACEs may be a potential factor influencing the onset of AD. In addition, previous  
54  
55  
56  
57  
58  
59  
60

1  
2  
3 evidence reports positive social factors to be protective against AD [25-28], which therefore  
4  
5 suggests, in reverse conclusion, negative influences of ACEs.  
6  
7  
8  
9

10 In addition, the relationship between ACEs and AD may vary by age and/or sex, possibly due  
11  
12 to age and sex differences in neurological development and stress reactions [13, 18, 29].  
13

14 Previous evidence reports the prevalence of ACEs increases with age, suggesting differences  
15  
16 in age stages of a child's development may have unique associations to later adult health [13,  
17  
18 20, 29-32]. Additionally, sex differences have been reported for adverse childhood  
19  
20 experiences and other harmful health outcomes [20, 30-32]. Therefore, the relationship  
21  
22 between ACEs and AD may also differ between age and/or sex.  
23  
24  
25  
26  
27

28 To our knowledge, no previous review has synthesised evidence on the extent of knowledge  
29  
30 regarding ACEs and their relationship with AD. We aim to identify and evaluate the existing  
31  
32 literature, provide an indication of the current quality and level of evidence, and directions  
33  
34 for future research on this important and sensitive topic.  
35  
36  
37  
38  
39

### 40 **Objectives**

41  
42 The primary objective is to conduct a systematic review and meta-analysis of published  
43  
44 observational studies that examine the associations between ACEs (occurring before the age  
45  
46 of 18 years) and the risk of AD in adulthood. Where feasible, the secondary objectives are to  
47  
48 examine potential differences between sex, age and number and type of exposure to ACEs  
49  
50 and the associated risk of Alzheimer's disease.  
51  
52  
53  
54  
55  
56  
57  
58  
59  
60



## **Methods**

The development of this protocol was guided by the Preferred Reporting Items for Systematic Reviews and Meta-Analyses Protocols (PRISMA-P) [33].

**Eligibility criteria:** Studies will be considered for inclusion according to the following criteria:

**Study designs:** Published, peer-reviewed research articles reporting on studies that are longitudinal cohort, case-control and/or cross-sectional observational studies will be eligible.

**Participants:** Studies will be eligible if they examine participants who were exposed to any ACE before the age of 18 years. There will be no other restrictions on participant demographics (e.g. sex/nationality).

**Exposure:** Any ACEs before 18 years of age is the exposure of interest and includes

- Emotional/physical/sexual abuse
- Emotional/physical neglect
- Household challenges, such as exposure to domestic/family/intimate violence, substance abuse, mental illness, criminal behaviour and parental loss (death, separation and divorce) [13].

**Comparison:** Studies will be eligible if they include an appropriate comparison group, such as participants who were not exposed to any ACEs.

1  
2  
3 **Outcomes:** Studies will be eligible if they examine the population/exposure of interest in  
4 relation to the risk of AD. For eligibility purposes, the diagnosis of AD must be consistent  
5 with an internationally recognised clinical or diagnostic classification system such as the  
6 International Classification of Diseases (ICD), Diagnostic and Statistical Manual of Mental  
7 Disorders (DSM), National Institute of Neurological and Communicative Diseases and  
8 Stroke/Alzheimer's Disease and Related Disorders Association (NINCDS-ADRDA criteria),  
9 and/or National Institute on Aging–Alzheimer's Association (NIA-AA workgroup criteria).  
10  
11  
12  
13  
14  
15  
16  
17  
18  
19  
20

21 **Setting:** Participants from general and clinical populations will be eligible.  
22  
23  
24  
25

26 **Language:** Worldwide studies that are published in English will be eligible. Google  
27 Translate may be considered if potentially relevant studies are identified that are published in  
28 journals in languages other than English.  
29  
30  
31  
32  
33  
34

35 **Exclusions:** Studies that are published in a language other than English, as well as  
36 randomized controlled trials will be excluded.  
37  
38  
39  
40  
41

42 **Search strategy:** An electronic search will be performed in three research databases  
43 (CINAHL, MEDLINE Complete and PsycInfo) using the Ebscohost platform to identify  
44 relevant studies. The search strategy will be built combining the main key elements of the  
45 Population, Exposure, Comparator, and Outcomes (PECO) inclusion criteria. To develop the  
46 search strategy, a list of relevant index terms and key words were derived from the existing,  
47 relevant literature and combined using Boolean operators, truncations, and explode functions  
48 (Table 1). A final search syntax for each electronic database is included in the published  
49 supplementary file.  
50  
51  
52  
53  
54  
55  
56  
57  
58  
59  
60

## Table 1

## Search terms.

("Child\*" OR Young\* OR Early) AND (Physical\* OR Emotion\* OR Sexual\*) AND (Abuse OR Neglect) OR ("Adverse childhood experiences" OR "Child abuse+" OR "Parental death+" OR "Child of impaired parents" OR "Divorce" OR "Domestic violence+") OR (Parental crime OR Parental alcohol abuse OR Parental drug abuse) AND ("Alzheimer disease" OR "Dementia")

In consultation with an academic librarian, the search strategy will be refined, translated accordingly for each database, then pilot tested for MEDLINE Complete, PsycInfo and CINAHL databases. A total of 781 studies were yielded from the preliminary search conducted on 18 September 2020. Complete details regarding the final search strategy and results (including dates searched) will be presented in the ensuing systematic review and meta-analysis.

**Other sources:** Grey literature, such as theses and conference presentations will be searched using an adapted search in Google and will be considered for inclusion if shown to meet the eligibility criteria. The Google search may also yield additional relevant journal articles to supplement the database searching. A manual search of the reference lists of included studies will then be performed to identify any further studies.

**Data management and selection process:** One reviewer (K.B.C.) will implement the search strategy, and then import, manage and remove duplicate records using Covidence. Then, two reviewers (K.B.C. and E.C.W.) will independently screen the titles/abstracts according to a predetermined screening checklist. Conflicts at the screening stage between the two

1  
2  
3 reviewers will be resolved through discussion with a third reviewer (L.J.W.) to provide final  
4  
5 judgement. Final inclusions will be decided by full-text reading of the articles by two  
6  
7 reviewers (K.B.C. and E.C.W.) independently, and consensus with the third reviewer  
8  
9 (L.J.W.). A PRISMA flow chart of the selection process and reasons for exclusion at the full-  
10  
11 text stage will be reported.  
12  
13  
14  
15  
16

17 **Data collection and extraction:** Pertinent data to address the study objectives will be  
18  
19 extracted from the included studies. Covidence, as well as a pre-designed form will be used  
20  
21 to extract the data, and will be pilot tested by two reviewers.  
22  
23  
24  
25

26 **Data items:** Indicative data to be extracted are as follows:  
27

- 28 • Pertinent citation/study details (e.g. author/study/year/country)
- 29
- 30 • Study approach (e.g. aims/design/setting)
- 31
- 32 • Participant/population information (e.g. age/sex/demographics/sample size)
- 33
- 34 • Exposure information (e.g. number/type of ACEs/age of exposure)
- 35
- 36 • Comparator information
- 37
- 38 • Outcomes (e.g. diagnosis of Alzheimer's disease).
- 39
- 40
- 41
- 42
- 43
- 44

45 **Outcomes and prioritisation:** As per the objectives, the main outcome will be a diagnosis of  
46  
47 AD. If sufficient appropriate studies are available, we will examine differences in sex and age  
48  
49 of exposure and the number and type of adverse childhood experiences. These will be  
50  
51 described and reported in the ensuing review.  
52  
53  
54  
55

56 **Assessment of methodological quality of included studies:** Assessment of methodological  
57  
58 quality of individual studies will be performed by two independent reviewers, and consensus  
59  
60

1  
2  
3 with the third reviewer using the US National Heart, Lung and Blood Institute 14-item  
4 checklist for observational cohort and cross-sectional studies [34]. The methodology of  
5 eligible studies will be scored using the predetermined criteria as follows: good, fair or poor,  
6  
7  
8 with a rating of poor translating to a high risk of bias [34].  
9  
10  
11  
12  
13

14  
15 **Reporting and presenting results:** The reporting of the findings from the proposed review  
16 will adhere to the PRISMA guidelines [35].  
17  
18  
19

20  
21 **Qualitative synthesis:** A description of all relevant studies and their methodological quality  
22 will be presented (e.g. in tables/text), and a qualitative/narrative summary of the key findings  
23 will be reported in text.  
24  
25  
26  
27  
28  
29

30  
31 **Quantitative synthesis (meta-analysis):** Where appropriate, a quantitative synthesis will be  
32 performed using random-effects statistical models, given the expected diversity among  
33 populations/exposures of ACEs. Where possible, Odd Ratios (ORs)/Hazard Ratios (HRs)  
34 (e.g. for categorical outcome/diagnosis data) and their 95% confidence intervals (CIs) will be  
35 calculated and reported. Although a meta-analysis is desired, given that <800 papers were  
36 returned upon pilot testing the search criteria, and there may be heterogeneity in the available  
37 studies, conducting a meta-analysis may not be possible.  
38  
39  
40  
41  
42  
43  
44  
45  
46  
47  
48

49 If sufficient data is available, we will also consider subgroup analyses of:

- 51 • Sex
- 52
- 53 • Age of exposure
- 54
- 55 • Number of ACEs
- 56
- 57 • Type of ACEs.
- 58
- 59
- 60

1  
2  
3  
4  
5 A statistician will be consulted regarding the appropriateness of assessing risk of bias,  
6 heterogeneity, and reporting bias on the included studies. Complete details will be presented  
7  
8 in the review.  
9  
10  
11  
12  
13

14 **Dissemination:** This protocol is registered with PROSPERO (CRD42020191439), an  
15 international database of health-related systematic review protocols. The findings will be  
16  
17 published in a peer-reviewed scientific journal, and results will be shared at national and  
18  
19 international conferences.  
20  
21  
22  
23  
24  
25

26 **Ethics:** Only published data will be included in this systematic review, therefore ethical  
27 approval is not required.  
28  
29  
30  
31  
32  
33  
34  
35  
36  
37  
38  
39  
40  
41  
42  
43  
44  
45  
46  
47  
48  
49  
50  
51  
52  
53  
54  
55  
56  
57  
58  
59  
60

## **Footnotes**

**Patient and Public Involvement:** Patients and the public will have no involvement in the design, or conduct, or reporting, or dissemination plans of the research.

**Contribution statement:** K.B.C., L.J.W. and J.A.P. planned and designed the study. K.B.C. will implement the search strategy, and then import, manage and remove duplicate records using Covidence. K.B.C. and E.C.W. will independently screen the titles/abstracts according to a predetermined screening checklist. Conflicts at the screening stage between the two reviewers will be resolved through discussion with L.J.W. to provide final judgement. Final inclusions will be decided by full-text reading of the articles by K.B.C. and E.C.W. independently, and consensus with L.J.W., K.B.C. will analyse and interpret the data. L.J.W. and J.A.P. will help supervise the project. K.B.C. will report and present the findings. A.L.S., S.E.Q. and B.A. will provide critical feedback throughout the study. All authors will contribute to the final version of the manuscript.

**Funding:** K.B.C. is supported by the Australian Rotary Health/Bing Taylor PhD Scholarship in Dementia. L.J.W is supported by a NHMRC Investigator grant (1174060). S.E.Q. is supported by the Päivikki ja Sakari Sohlbergin Säätiö. E.C.W. and B.A. are supported by a Deakin University Postgraduate Research Scholarship (DUPRS). The funding sources will have no role in the study design, data collection, data analysis, data interpretation, writing of the report or the decision to submit the paper for publication.

**Conflicts of interest:** None declared.

## References

1. Franceschi, C., et al., *The Continuum of Aging and Age-Related Diseases: Common Mechanisms but Different Rates*. Front Med (Lausanne), 2018. **5**: p. 61.
2. Blazer, D. G., Yaffe. K., and Liverman. C. T, *Cognitive Aging: Progress in Understanding and Opportunities for Action*, Committee on the Public Health Dimensions of Cognitive Aging, Board on Health Sciences Policy: Washington (DC), 2015.
3. Thies, W. and Bleiler. L, *Alzheimer's disease facts and figures*. The Journal of Alzheimer's Association, 2013. **9**(2): p. 208-45.
4. Bahnasy, W. S., El-Heneedy. Y. A., and El-Seidy. E. A., *Sex Hormones and Alzheimer's Disease*, in *Sex Hormones in Neurodegenerative Processes and Diseases*. 2018.
5. Buchhave, P., et al., *Cerebrospinal Fluid Levels of  $\beta$ -Amyloid 1-42, but Not of Tau, Are Fully Changed Already 5 to 10 Years Before the Onset of Alzheimer Dementia*. Archives of General Psychiatry, 2011. **69**(1): p. 98-106.
6. Lane, C. A., Hardy. J., and Schott. J. M., *Alzheimer's disease*. Eur J Neurol, 2018. **25**(1): p. 59-70.
7. Baumgart, M., et al., *Summary of the evidence on modifiable risk factors for cognitive decline and dementia: A population-based perspective*. Alzheimers Dement, 2015. **11**(6): p. 718-26.
8. Morawe, T., et al., *Protein homeostasis, aging and Alzheimer's disease*. Mol Neurobiol, 2012. **46**(1): p. 41-54.
9. d'Errico, P. and Meyer-Luehmann. M., *Mechanisms of Pathogenic Tau and Abeta Protein Spreading in Alzheimer's Disease*. Front Aging Neurosci, 2020. **12**: p. 265.
10. Simic, G., et al., *Monoaminergic neuropathology in Alzheimer's disease*. Prog Neurobiol, 2017. **151**: p. 101-138.



- 1  
2  
3 11. Theendakara, V., et al., *Direct Transcriptional Effects of Apolipoprotein E*. J  
4 Neurosci, 2016. **36**(3): p. 685-700.
- 5  
6  
7 12. Shamsi, M. B., et al., *Epigenetics of human diseases and scope in future therapeutics*.  
8 J Taibah Univ Med Sci, 2017. **12**(3): p. 205-211.
- 9  
10  
11 13. Felitti, V. J., et al., *Relationship of childhood abuse and household dysfunction to*  
12 *many of the leading causes of death in adults. The Adverse Childhood Experiences*  
13 *(ACE) Study*. American Journal of Preventative medicine, 1998. **14**(4): p. 245-258.
- 14  
15  
16 14. Korten, N. C., et al., *Adverse Childhood and Recent Negative Life Events:*  
17 *Contrasting Associations With Cognitive Decline in Older Persons*. J Geriatr  
18 Psychiatry Neurol, 2014. **27**(2): p. 128-38.
- 19  
20  
21 15. Richards, M. and Wadsworth. M. E., *Long term effects of early adversity on cognitive*  
22 *function*. Arch Dis Child, 2004. **89**(10): p. 922-7.
- 23  
24  
25 16. Ritchie, K., et al., *Adverse childhood environment and late-life cognitive functioning*.  
26 Int J Geriatr Psychiatry, 2011. **26**(5): p. 503-10.
- 27  
28  
29 17. Norton, M. C., et al., *Early parental death and remarriage of widowed parents as risk*  
30 *factors for Alzheimer disease: the Cache County study*. Am J Geriatr Psychiatry,  
31 2011. **19**(9): p. 814-24.
- 32  
33  
34 18. Danese, A., et al., *Adverse childhood experiences and adult risk factors for age-*  
35 *related disease: depression, inflammation, and clustering of metabolic risk markers*. .  
36 Archives of Paediatric & Adolescent Medicine, 2009. **163**(12): p. 1135-1143.
- 37  
38  
39 19. Chapman, D. P., et al., *Adverse childhood experiences and the risk of depressive*  
40 *disorders in adulthood*. J Affect Disord, 2004. **82**(2): p. 217-25.
- 41  
42  
43 20. Tani, Y., Fujiwara. T., and Kondo. K., *Association Between Adverse Childhood*  
44 *Experiences and Dementia in Older Japanese Adults*. JAMA Netw Open, 2020. **3**(2):  
45 p. e1920740.
- 46  
47  
48 21. Burke, S. L., et al., *Moderating risk of Alzheimer's disease through the use of*  
49 *anxiolytic agents*. Int J Geriatr Psychiatry, 2017. **32**(12): p. 1312-1321.
- 50  
51  
52  
53  
54  
55  
56  
57  
58  
59  
60

- 1
  - 2
  - 3
  - 4
  - 5
  - 6
  - 7
  - 8
  - 9
  - 10
  - 11
  - 12
  - 13
  - 14
  - 15
  - 16
  - 17
  - 18
  - 19
  - 20
  - 21
  - 22
  - 23
  - 24
  - 25
  - 26
  - 27
  - 28
  - 29
  - 30
  - 31
  - 32
  - 33
  - 34
  - 35
  - 36
  - 37
  - 38
  - 39
  - 40
  - 41
  - 42
  - 43
  - 44
  - 45
  - 46
  - 47
  - 48
  - 49
  - 50
  - 51
  - 52
  - 53
  - 54
  - 55
  - 56
  - 57
  - 58
  - 59
  - 60
22. De Bellis, M. D. and Zisk. A., *The biological effects of childhood trauma*. Child Adolesc Psychiatr Clin N Am, 2014. **23**(2): p. 185-222, vii.
23. Fink, D. S. and Galea. S., *Life course epidemiology of trauma and related psychopathology in civilian populations*. Curr Psychiatry Rep, 2015. **17**(5): p. 31.
24. Shea, T. B., *While I Still Remember: 30 Years of Alzheimer's Disease Research*. J Alzheimers Dis, 2018. **62**(3): p. 1049-1057.
25. Lemche, E., *Early Life Stress and Epigenetics in Late-onset Alzheimer's Dementia: A Systematic Review*. Curr Genomics, 2018. **19**(7): p. 522-602.
26. Khondoker, M., et al., *Positive and Negative Experiences of Social Support and Risk of Dementia in Later Life: An Investigation Using the English Longitudinal Study of Ageing*. J Alzheimers Dis, 2017. **58**(1): p. 99-108.
27. Mortimer, J. A., et al., *Changes in brain volume and cognition in a randomized trial of exercise and social interaction in a community-based sample of non-demented Chinese elders*. J Alzheimers Dis, 2012. **30**(4): p. 757-66.
28. Evans, I. E. M., et al., *Social Isolation and Cognitive Function in Later Life: A Systematic Review and Meta-Analysis*. J Alzheimers Dis, 2019. **70**(s1): p. S119-S144.
29. Hughes, K., et al., *The effect of multiple adverse childhood experiences on health: a systematic review and meta-analysis*. The Lancet Public Health, 2017. **2**(8): p. e356-e366.
30. Chartier, M. J., Walker. J. R., and Naimark. B., *Separate and cumulative effects of adverse childhood experiences in predicting adult health and health care utilization*. Child Abuse Negl, 2010. **34**(6): p. 454-64.
31. Flaherty, E. G., et al., *Adverse childhood experiences and child health in early adolescence*. JAMA Paediatrics, 2013. **167**(7): p. 622-629.
32. Flaherty, E. G., et al., *Effect of early childhood adversity on child health*. Archives of Pediatric & Adolescent Medicine, 2006. **160**(12): p. 1232-1238.

- 1  
2  
3 33. Moher, D., et al., *Preferred reporting items for systematic reviews and meta-analyses: the PRISMA statement*. PLoS Med, 2009. **6**(7): p. e1000097.  
4  
5  
6  
7  
8 34. National Institute of Health., *National Heart, Lung and Blood Institute quality assessment tool for observational cohort and cross-sectional studies*. Available from  
9 <https://www.nhlbi.nih.gov/health-topics/study-quality-assessment-tools>.  
10  
11  
12  
13  
14 35. Page, M. J., et al., *The PRISMA 2020 statement: an updated guideline for reporting systematic reviews*. BMJ, 2021. **372**: p. n71.  
15  
16  
17  
18  
19  
20  
21  
22  
23  
24  
25  
26  
27  
28  
29  
30  
31  
32  
33  
34  
35  
36  
37  
38  
39  
40  
41  
42  
43  
44  
45  
46  
47  
48  
49  
50  
51  
52  
53  
54  
55  
56  
57  
58  
59  
60

## Adverse childhood experiences and Alzheimer's Disease: A systematic review and meta-analysis protocol

### Search Strategy

#### Medline Complete via EBSCOhost

| Search line | Index/keyword/combinations             |
|-------------|----------------------------------------|
| S1          | (MH "Child+")                          |
| S2          | TI Child*                              |
| S3          | AB Child*                              |
| S4          | TI Young*                              |
| S5          | AB Young*                              |
| S6          | TI Early*                              |
| S7          | AB Early*                              |
| S8          | S1 OR S2 OR S3 OR S4 OR S5 OR S6 OR S7 |
| S9          | TI Physical*                           |
| S10         | AB Physical*                           |
| S11         | TI Sexual*                             |
| S12         | AB Sexual*                             |
| S13         | TI Emotion*                            |
| S14         | AB Emotion*                            |
| S15         | S9 OR S10 OR S11 OR S12 OR S13 OR S14  |
| S16         | TI Abuse                               |
| S17         | AB Abuse                               |
| S18         | TI Neglect                             |
| S19         | AB Neglect                             |
| S20         | S16 OR S17 OR S18 OR S19               |
| S21         | S8 AND S15 AND S20                     |
| S22         | (MH "Adverse childhood experiences")   |
| S23         | TI Adverse childhood experiences       |
| S24         | AB Adverse childhood experiences       |
| S25         | (MH "Child abuse+")                    |
| S26         | TI Child abuse                         |
| S27         | AB Child abuse                         |
| S28         | (MH "Child of impaired parents")       |
| S29         | TI Child of impaired parents           |
| S30         | AB Child of impaired parents           |

|     |                                                                                                                                                                      |
|-----|----------------------------------------------------------------------------------------------------------------------------------------------------------------------|
| S31 | (MH "Divorce")                                                                                                                                                       |
| S32 | TI Divorce                                                                                                                                                           |
| S33 | AB Divorce                                                                                                                                                           |
| S34 | (MH "Domestic violence+")                                                                                                                                            |
| S35 | TI Domestic violence                                                                                                                                                 |
| S36 | AB Domestic violence                                                                                                                                                 |
| S37 | (MH "Parental death+")                                                                                                                                               |
| S38 | TI Parental death                                                                                                                                                    |
| S39 | AB Parental death                                                                                                                                                    |
| S40 | AB Parental alcohol abuse                                                                                                                                            |
| S41 | TI Parental alcohol abuse                                                                                                                                            |
| S42 | AB Parental drug abuse                                                                                                                                               |
| S43 | TI Parental drug abuse                                                                                                                                               |
| S44 | AB Parental crime                                                                                                                                                    |
| S45 | TI Parental crime                                                                                                                                                    |
| S46 | S22 OR S23 OR S24 OR S25 OR S26 OR S27 OR S28 OR S29 OR S30 OR S31 OR S32 OR S33 OR S34 OR S35 OR S36 OR S37 OR S38 OR S39 OR S40 OR S41 OR S42 OR S43 OR S44 OR S45 |
| S47 | S21 OR S46                                                                                                                                                           |
| S48 | (MH "Alzheimer disease")                                                                                                                                             |
| S49 | TI Alzheimer's disease                                                                                                                                               |
| S50 | AB Alzheimer's disease                                                                                                                                               |
| S51 | (MH "Dementia")                                                                                                                                                      |
| S52 | TI Dementia                                                                                                                                                          |
| S53 | AB Dementia                                                                                                                                                          |
| S54 | S48 OR S49 OR S50 OR S51 OR S52 OR S53                                                                                                                               |
| S55 | S47 AND S54                                                                                                                                                          |

Note. Apply equivalent subjects; Search modes - Boolean/Phrase; AB= search in abstract field; TI = search title field; MH = Index Term field

#### APA PsycInfo via EBSCOhost

| Search line | Index/keyword/combinations |
|-------------|----------------------------|
| S1          | TI Child*                  |
| S2          | AB Child*                  |
| S3          | TI Young*                  |

|            |                                      |
|------------|--------------------------------------|
| <b>S4</b>  | AB Young*                            |
| <b>S5</b>  | TI Early*                            |
| <b>S6</b>  | AB Early*                            |
| <b>S7</b>  | S1 OR S2 OR S3 OR S4 OR S5 OR S6     |
| <b>S8</b>  | TI Physical*                         |
| <b>S9</b>  | AB Physical*                         |
| <b>S10</b> | TI Sexual*                           |
| <b>S11</b> | AB Sexual*                           |
| <b>S12</b> | TI Emotion*                          |
| <b>S13</b> | AB Emotion*                          |
| <b>S14</b> | S8 OR S9 OR S10 OR S11 OR S12 OR S13 |
| <b>S15</b> | TI Abuse                             |
| <b>S16</b> | AB Abuse                             |
| <b>S17</b> | TI Neglect                           |
| <b>S18</b> | AB Neglect                           |
| <b>S19</b> | S15 OR S16 OR S17 OR S18             |
| <b>S20</b> | S7 AND S14 AND S19                   |
| <b>S21</b> | (DE “Childhood Adversity”)           |
| <b>S22</b> | TI Childhood Adversity               |
| <b>S23</b> | AB Childhood Adversity               |
| <b>S24</b> | (DE “Child Abuse+”)                  |
| <b>S25</b> | TI Child Abuse                       |
| <b>S26</b> | AB Child Abuse                       |
| <b>S27</b> | (DE “Parent child relations”)        |
| <b>S28</b> | TI Parent child relations            |
| <b>S29</b> | AB Parent child relations            |
| <b>S30</b> | (DE “Divorce”)                       |
| <b>S31</b> | TI Divorce                           |
| <b>S32</b> | AB Divorce                           |
| <b>S33</b> | (DE “Domestic violence”)             |
| <b>S34</b> | TI Domestic violence                 |
| <b>S35</b> | AB Domestic violence                 |
| <b>S36</b> | (DE “Parental death+”)               |
| <b>S37</b> | Parental death                       |
| <b>S38</b> | Parental death                       |
| <b>S39</b> | AB Parental alcohol abuse            |
| <b>S40</b> | TI Parental alcohol abuse            |
| <b>S41</b> | AB Parental drug abuse               |
| <b>S42</b> | TI Parental drug abuse               |

|     |                                                                                                                                                                      |
|-----|----------------------------------------------------------------------------------------------------------------------------------------------------------------------|
| S43 | AB Parental crime                                                                                                                                                    |
| S44 | TI Parental crime                                                                                                                                                    |
| S45 | S21 OR S22 OR S23 OR S24 OR S25 OR S26 OR S27 OR S28 OR S29 OR S30 OR S31 OR S32 OR S33 OR S34 OR S35 OR S36 OR S37 OR S38 OR S39 OR S40 OR S41 OR S42 OR S43 OR S44 |
| S46 | S20 OR S45                                                                                                                                                           |
| S47 | (DE "Alzheimer's disease")                                                                                                                                           |
| S48 | TI Alzheimer's disease                                                                                                                                               |
| S49 | AB Alzheimer's disease                                                                                                                                               |
| S50 | (DE "Dementia+")                                                                                                                                                     |
| S51 | TI Dementia                                                                                                                                                          |
| S52 | AB Dementia                                                                                                                                                          |
| S53 | S47 OR S48 OR S49 OR S50 OR S51 OR S52                                                                                                                               |
| S54 | S45 AND S53                                                                                                                                                          |

Note. Apply equivalent subjects; Search modes - Boolean/Phrase; AB= search in abstract field; TI = search title field; DE = Index Term field

#### Cinahl complete via EBSCOhost

| Search line | Index/keyword/combinations             |
|-------------|----------------------------------------|
| S1          | (MH "Child+")                          |
| S2          | TI Child*                              |
| S3          | AB Child*                              |
| S4          | TI Young*                              |
| S5          | AB Young*                              |
| S6          | TI Early*                              |
| S7          | AB Early*                              |
| S8          | S1 OR S2 OR S3 OR S4 OR S5 OR S6 OR S7 |
| S9          | TI Physical*                           |
| S10         | AB Physical*                           |
| S11         | TI Sexual*                             |
| S12         | AB Sexual*                             |
| S13         | TI Emotion*                            |
| S14         | AB Emotion*                            |
| S15         | S9 OR S10 OR S11 OR S12 OR S13 OR S14  |
| S16         | TI Abuse                               |
| S17         | AB Abuse                               |
| S18         | TI Neglect                             |
| S19         | AB Neglect                             |
| S20         | S16 OR S17 OR S18 OR S19               |
| S21         | S8 AND S15 AND S20                     |

|     |                                                                                                                                                                      |
|-----|----------------------------------------------------------------------------------------------------------------------------------------------------------------------|
| S22 | (MH "Adverse childhood experiences")                                                                                                                                 |
| S23 | TI Adverse childhood experiences                                                                                                                                     |
| S24 | AB Adverse childhood experiences                                                                                                                                     |
| S25 | (MH "Child abuse+")                                                                                                                                                  |
| S26 | TI Child abuse                                                                                                                                                       |
| S27 | AB Child abuse                                                                                                                                                       |
| S28 | (MH "Child of impaired parents")                                                                                                                                     |
| S29 | TI Child of impaired parents                                                                                                                                         |
| S30 | AB Child of impaired parents                                                                                                                                         |
| S31 | (MH "Divorce")                                                                                                                                                       |
| S32 | TI Divorce                                                                                                                                                           |
| S33 | AB Divorce                                                                                                                                                           |
| S34 | (MH "Domestic violence+")                                                                                                                                            |
| S35 | TI Domestic violence                                                                                                                                                 |
| S36 | AB Domestic violence                                                                                                                                                 |
| S37 | (MH "Parental death+")                                                                                                                                               |
| S38 | TI Parental death                                                                                                                                                    |
| S39 | AB Parental death                                                                                                                                                    |
| S40 | TI Parental alcohol abuse                                                                                                                                            |
| S41 | AB Parental alcohol abuse                                                                                                                                            |
| S42 | TI Parental drug abuse                                                                                                                                               |
| S43 | AB Parental drug abuse                                                                                                                                               |
| S44 | TI Parental crime                                                                                                                                                    |
| S45 | AB Parental crime                                                                                                                                                    |
| S46 | S22 OR S23 OR S24 OR S25 OR S26 OR S27 OR S28 OR S29 OR S30 OR S31 OR S32 OR S33 OR S34 OR S35 OR S36 OR S37 OR S38 OR S39 OR S40 OR S41 OR S42 OR S43 OR S44 OR S45 |
| S47 | S21 OR S46                                                                                                                                                           |
| S48 | (MH "Alzheimer disease")                                                                                                                                             |
| S49 | TI Alzheimer's disease                                                                                                                                               |
| S50 | AB Alzheimer's disease                                                                                                                                               |
| S51 | (MH "Dementia+")                                                                                                                                                     |
| S52 | TI Dementia                                                                                                                                                          |
| S53 | AB Dementia                                                                                                                                                          |
| S54 | S48 OR S49 OR S50 OR S51 OR S52 OR S53                                                                                                                               |
| S55 | S47 AND S54                                                                                                                                                          |

Note. Apply equivalent subjects; Search modes - Boolean/Phrase; AB= search in abstract field; TI = search title field; MH = Index Term field



**Google Advanced search**

| Search line                         | Index/keyword/combinations                                                                                                                                       |
|-------------------------------------|------------------------------------------------------------------------------------------------------------------------------------------------------------------|
| <b>S1 All these words</b>           | Adverse childhood experiences Alzheimer's disease Dementia                                                                                                       |
| <b>S2 This exact word or phrase</b> | "Adverse childhood experiences" "Alzheimer's disease"                                                                                                            |
| <b>S3 Any of these words</b>        | Child OR Young OR Early OR Physical OR Emotion OR Sexual OR Abuse OR Neglect OR Divorce OR Domestic OR violence OR Parental OR death OR crime OR alcohol OR drug |

For peer review only

**PRISMA-P (Preferred Reporting Items for Systematic review and Meta-Analysis Protocols) 2015 checklist: recommended items to address in a systematic review protocol\***

| Section and topic                 | Item No | Checklist item                                                                                                                                                                                                                |
|-----------------------------------|---------|-------------------------------------------------------------------------------------------------------------------------------------------------------------------------------------------------------------------------------|
| <b>ADMINISTRATIVE INFORMATION</b> |         |                                                                                                                                                                                                                               |
| Title:                            |         |                                                                                                                                                                                                                               |
| Identification                    | 1a      | Identify the report as a protocol of a systematic review                                                                                                                                                                      |
| Update                            | 1b      | If the protocol is for an update of a previous systematic review, identify as such                                                                                                                                            |
| Registration                      | 2       | If registered, provide the name of the registry (such as PROSPERO) and registration number                                                                                                                                    |
| Authors:                          |         |                                                                                                                                                                                                                               |
| Contact                           | 3a      | Provide name, institutional affiliation, e-mail address of all protocol authors; provide physical mailing address of corresponding author                                                                                     |
| Contributions                     | 3b      | Describe contributions of protocol authors and identify the guarantor of the review                                                                                                                                           |
| Amendments                        | 4       | If the protocol represents an amendment of a previously completed or published protocol, identify as such and list changes; otherwise, state plan for documenting important protocol amendments                               |
| Support:                          |         |                                                                                                                                                                                                                               |
| Sources                           | 5a      | Indicate sources of financial or other support for the review                                                                                                                                                                 |
| Sponsor                           | 5b      | Provide name for the review funder and/or sponsor                                                                                                                                                                             |
| Role of sponsor or funder         | 5c      | Describe roles of funder(s), sponsor(s), and/or institution(s), if any, in developing the protocol                                                                                                                            |
| <b>INTRODUCTION</b>               |         |                                                                                                                                                                                                                               |
| Rationale                         | 6       | Describe the rationale for the review in the context of what is already known                                                                                                                                                 |
| Objectives                        | 7       | Provide an explicit statement of the question(s) the review will address with reference to participants, interventions, comparators, and outcomes (PICO)                                                                      |
| <b>METHODS</b>                    |         |                                                                                                                                                                                                                               |
| Eligibility criteria              | 8       | Specify the study characteristics (such as PICO, study design, setting, time frame) and report characteristics (such as years considered, language, publication status) to be used as criteria for eligibility for the review |
| Information sources               | 9       | Describe all intended information sources (such as electronic databases, contact with study authors, trial registers or other grey literature sources) with planned dates of coverage                                         |
| Search strategy                   | 10      | Present draft of search strategy to be used for at least one electronic database, including planned limits, such that it could be repeated                                                                                    |
| Study records:                    |         |                                                                                                                                                                                                                               |
| Data management                   | 11a     | Describe the mechanism(s) that will be used to manage records and data throughout the review                                                                                                                                  |

1  
2  
3  
4  
5  
6  
7  
8  
9  
10  
11  
12  
13  
14  
15  
16  
17  
18  
19  
20  
21  
22  
23  
24  
25  
26  
27  
28  
29  
30  
31  
32  
33  
34  
35  
36  
37  
38  
39  
40  
41  
42  
43  
44  
45  
46

|                                    |     |                                                                                                                                                                                                                                                  |
|------------------------------------|-----|--------------------------------------------------------------------------------------------------------------------------------------------------------------------------------------------------------------------------------------------------|
| Selection process                  | 11b | State the process that will be used for selecting studies (such as two independent reviewers) through each phase of the review (that is, screening, eligibility and inclusion in meta-analysis)                                                  |
| Data collection process            | 11c | Describe planned method of extracting data from reports (such as piloting forms, done independently, in duplicate), any processes for obtaining and confirming data from investigators                                                           |
| Data items                         | 12  | List and define all variables for which data will be sought (such as PICO items, funding sources), any pre-planned data assumptions and simplifications                                                                                          |
| Outcomes and prioritization        | 13  | List and define all outcomes for which data will be sought, including prioritization of main and additional outcomes, with rationale                                                                                                             |
| Risk of bias in individual studies | 14  | Describe anticipated methods for assessing risk of bias of individual studies, including whether this will be done at the outcome or study level, or both; state how this information will be used in data synthesis                             |
| Data synthesis                     | 15a | Describe criteria under which study data will be quantitatively synthesised                                                                                                                                                                      |
|                                    | 15b | If data are appropriate for quantitative synthesis, describe planned summary measures, methods of handling data and methods of combining data from studies, including any planned exploration of consistency (such as $I^2$ , Kendall's $\tau$ ) |
|                                    | 15c | Describe any proposed additional analyses (such as sensitivity or subgroup analyses, meta-regression)                                                                                                                                            |
|                                    | 15d | If quantitative synthesis is not appropriate, describe the type of summary planned                                                                                                                                                               |
| Meta-bias(es)                      | 16  | Specify any planned assessment of meta-bias(es) (such as publication bias across studies, selective reporting within studies)                                                                                                                    |
| Confidence in cumulative evidence  | 17  | Describe how the strength of the body of evidence will be assessed (such as GRADE)                                                                                                                                                               |

**\* It is strongly recommended that this checklist be read in conjunction with the PRISMA-P Explanation and Elaboration (cite when available) for important clarification on the items. Amendments to a review protocol should be tracked and dated. The copyright for PRISMA-P (including checklist) is held by the PRISMA-P Group and is distributed under a Creative Commons Attribution Licence 4.0.**

*From: Shamseer L, Moher D, Clarke M, Ghersi D, Liberati A, Petticrew M, Shekelle P, Stewart L, PRISMA-P Group. Preferred reporting items for systematic review and meta-analysis protocols (PRISMA-P) 2015: elaboration and explanation. BMJ. 2015 Jan 2;349(jan02 1):g7647.*
