# Supplementary material for: Relationship between adverse childhood experiences and Alzheimer’s disease: a systematic review and meta-analysis protocol
Source: PubMed Central journal article supplement — BMJ Open. 2021 Aug 5;11(8):e049768. doi: 10.1136/bmjopen-2021-049768 (PMC8344279; doi:10.1136/bmjopen-2021-049768), 2021-08-05
Supplement: bmjopen-2021-049768supp001.pdf [file bmjopen-2021-049768supp001.pdf]

## Adverse childhood experiences and Alzheimer's Disease: A systematic review and meta-analysis protocol

### Search Strategy

#### Medline Complete via EBSCOhost

| Search line | Index/keyword/combinations             |
|-------------|----------------------------------------|
| S1          | (MH "Child+")                          |
| S2          | TI Child*                              |
| S3          | AB Child*                              |
| S4          | TI Young*                              |
| S5          | AB Young*                              |
| S6          | TI Early*                              |
| S7          | AB Early*                              |
| S8          | S1 OR S2 OR S3 OR S4 OR S5 OR S6 OR S7 |
| S9          | TI Physical*                           |
| S10         | AB Physical*                           |
| S11         | TI Sexual*                             |
| S12         | AB Sexual*                             |
| S13         | TI Emotion*                            |
| S14         | AB Emotion*                            |
| S15         | S9 OR S10 OR S11 OR S12 OR S13 OR S14  |
| S16         | TI Abuse                               |
| S17         | AB Abuse                               |
| S18         | TI Neglect                             |
| S19         | AB Neglect                             |
| S20         | S16 OR S17 OR S18 OR S19               |
| S21         | S8 AND S15 AND S20                     |
| S22         | (MH "Adverse childhood experiences")   |
| S23         | TI Adverse childhood experiences       |
| S24         | AB Adverse childhood experiences       |
| S25         | (MH "Child abuse+")                    |
| S26         | TI Child abuse                         |
| S27         | AB Child abuse                         |
| S28         | (MH "Child of impaired parents")       |
| S29         | TI Child of impaired parents           |
| S30         | AB Child of impaired parents           |

|     |                                                                                                                                                                      |
|-----|----------------------------------------------------------------------------------------------------------------------------------------------------------------------|
| S31 | (MH "Divorce")                                                                                                                                                       |
| S32 | TI Divorce                                                                                                                                                           |
| S33 | AB Divorce                                                                                                                                                           |
| S34 | (MH "Domestic violence+")                                                                                                                                            |
| S35 | TI Domestic violence                                                                                                                                                 |
| S36 | AB Domestic violence                                                                                                                                                 |
| S37 | (MH "Parental death+")                                                                                                                                               |
| S38 | TI Parental death                                                                                                                                                    |
| S39 | AB Parental death                                                                                                                                                    |
| S40 | AB Parental alcohol abuse                                                                                                                                            |
| S41 | TI Parental alcohol abuse                                                                                                                                            |
| S42 | AB Parental drug abuse                                                                                                                                               |
| S43 | TI Parental drug abuse                                                                                                                                               |
| S44 | AB Parental crime                                                                                                                                                    |
| S45 | TI Parental crime                                                                                                                                                    |
| S46 | S22 OR S23 OR S24 OR S25 OR S26 OR S27 OR S28 OR S29 OR S30 OR S31 OR S32 OR S33 OR S34 OR S35 OR S36 OR S37 OR S38 OR S39 OR S40 OR S41 OR S42 OR S43 OR S44 OR S45 |
| S47 | S21 OR S46                                                                                                                                                           |
| S48 | (MH "Alzheimer disease")                                                                                                                                             |
| S49 | TI Alzheimer's disease                                                                                                                                               |
| S50 | AB Alzheimer's disease                                                                                                                                               |
| S51 | (MH "Dementia")                                                                                                                                                      |
| S52 | TI Dementia                                                                                                                                                          |
| S53 | AB Dementia                                                                                                                                                          |
| S54 | S48 OR S49 OR S50 OR S51 OR S52 OR S53                                                                                                                               |
| S55 | S47 AND S54                                                                                                                                                          |

Note. Apply equivalent subjects; Search modes - Boolean/Phrase; AB= search in abstract field; TI = search title field; MH = Index Term field

#### APA PsycInfo via EBSCOhost

| Search line | Index/keyword/combinations |
|-------------|----------------------------|
| S1          | TI Child*                  |
| S2          | AB Child*                  |
| S3          | TI Young*                  |

|     |                                      |
|-----|--------------------------------------|
| S4  | AB Young*                            |
| S5  | TI Early*                            |
| S6  | AB Early*                            |
| S7  | S1 OR S2 OR S3 OR S4 OR S5 OR S6     |
| S8  | TI Physical*                         |
| S9  | AB Physical*                         |
| S10 | TI Sexual*                           |
| S11 | AB Sexual*                           |
| S12 | TI Emotion*                          |
| S13 | AB Emotion*                          |
| S14 | S8 OR S9 OR S10 OR S11 OR S12 OR S13 |
| S15 | TI Abuse                             |
| S16 | AB Abuse                             |
| S17 | TI Neglect                           |
| S18 | AB Neglect                           |
| S19 | S15 OR S16 OR S17 OR S18             |
| S20 | S7 AND S14 AND S19                   |
| S21 | (DE "Childhood Adversity")           |
| S22 | TI Childhood Adversity               |
| S23 | AB Childhood Adversity               |
| S24 | (DE "Child Abuse+")                  |
| S25 | TI Child Abuse                       |
| S26 | AB Child Abuse                       |
| S27 | (DE "Parent child relations")        |
| S28 | TI Parent child relations            |
| S29 | AB Parent child relations            |
| S30 | (DE "Divorce")                       |
| S31 | TI Divorce                           |
| S32 | AB Divorce                           |
| S33 | (DE "Domestic violence")             |
| S34 | TI Domestic violence                 |
| S35 | AB Domestic violence                 |
| S36 | (DE "Parental death+")               |
| S37 | Parental death                       |
| S38 | Parental death                       |
| S39 | AB Parental alcohol abuse            |
| S40 | TI Parental alcohol abuse            |
| S41 | AB Parental drug abuse               |
| S42 | TI Parental drug abuse               |

|            |                                                                                                                                                                     |
|------------|---------------------------------------------------------------------------------------------------------------------------------------------------------------------|
| <b>S43</b> | AB Parental crime                                                                                                                                                   |
| <b>S44</b> | TI Parental crime                                                                                                                                                   |
| <b>S45</b> | S21 OR S22 OR S23 OR S24 OR S25 OR S26 OR S27 OR S28 OR S29 OR S30 OR S31 OR 32 OR S33 OR S34 OR S35 OR S36 OR S37 OR S38 OR S39 OR S40 OR S41 OR S42 OR S43 OR S44 |
| <b>S46</b> | S20 OR S45                                                                                                                                                          |
| <b>S47</b> | (DE "Alzheimer's disease")                                                                                                                                          |
| <b>S48</b> | TI Alzheimer's disease                                                                                                                                              |
| <b>S49</b> | AB Alzheimer's disease                                                                                                                                              |
| <b>S50</b> | (DE "Dementia+")                                                                                                                                                    |
| <b>S51</b> | TI Dementia                                                                                                                                                         |
| <b>S52</b> | AB Dementia                                                                                                                                                         |
| <b>S53</b> | S47 OR S48 OR S49 OR S50 OR S51 OR S52                                                                                                                              |
| <b>S54</b> | S45 AND S53                                                                                                                                                         |

Note. Apply equivalent subjects; Search modes - Boolean/Phrase; AB= search in abstract field; TI = search title field; DE = Index Term field

#### Cinahl complete via EBSCOhost

| <b>Search line</b> | <b>Index/keyword/combinations</b>      |
|--------------------|----------------------------------------|
| <b>S1</b>          | (MH "Child+")                          |
| <b>S2</b>          | TI Child*                              |
| <b>S3</b>          | AB Child*                              |
| <b>S4</b>          | TI Young*                              |
| <b>S5</b>          | AB Young*                              |
| <b>S6</b>          | TI Early*                              |
| <b>S7</b>          | AB Early*                              |
| <b>S8</b>          | S1 OR S2 OR S3 OR S4 OR S5 OR S6 OR S7 |
| <b>S9</b>          | TI Physical*                           |
| <b>S10</b>         | AB Physical*                           |
| <b>S11</b>         | TI Sexual*                             |
| <b>S12</b>         | AB Sexual*                             |
| <b>S13</b>         | TI Emotion*                            |
| <b>S14</b>         | AB Emotion*                            |
| <b>S15</b>         | S9 OR S10 OR S11 OR S12 OR S13 OR S14  |
| <b>S16</b>         | TI Abuse                               |
| <b>S17</b>         | AB Abuse                               |
| <b>S18</b>         | TI Neglect                             |
| <b>S19</b>         | AB Neglect                             |
| <b>S20</b>         | S16 OR S17 OR S18 OR S19               |
| <b>S21</b>         | S8 AND S15 AND S20                     |

|     |                                                                                                                                                                      |
|-----|----------------------------------------------------------------------------------------------------------------------------------------------------------------------|
| S22 | (MH "Adverse childhood experiences")                                                                                                                                 |
| S23 | TI Adverse childhood experiences                                                                                                                                     |
| S24 | AB Adverse childhood experiences                                                                                                                                     |
| S25 | (MH "Child abuse+")                                                                                                                                                  |
| S26 | TI Child abuse                                                                                                                                                       |
| S27 | AB Child abuse                                                                                                                                                       |
| S28 | (MH "Child of impaired parents")                                                                                                                                     |
| S29 | TI Child of impaired parents                                                                                                                                         |
| S30 | AB Child of impaired parents                                                                                                                                         |
| S31 | (MH "Divorce")                                                                                                                                                       |
| S32 | TI Divorce                                                                                                                                                           |
| S33 | AB Divorce                                                                                                                                                           |
| S34 | (MH "Domestic violence+")                                                                                                                                            |
| S35 | TI Domestic violence                                                                                                                                                 |
| S36 | AB Domestic violence                                                                                                                                                 |
| S37 | (MH "Parental death+")                                                                                                                                               |
| S38 | TI Parental death                                                                                                                                                    |
| S39 | AB Parental death                                                                                                                                                    |
| S40 | TI Parental alcohol abuse                                                                                                                                            |
| S41 | AB Parental alcohol abuse                                                                                                                                            |
| S42 | TI Parental drug abuse                                                                                                                                               |
| S43 | AB Parental drug abuse                                                                                                                                               |
| S44 | TI Parental crime                                                                                                                                                    |
| S45 | AB Parental crime                                                                                                                                                    |
| S46 | S22 OR S23 OR S24 OR S25 OR S26 OR S27 OR S28 OR S29 OR S30 OR S31 OR S32 OR S33 OR S34 OR S35 OR S36 OR S37 OR S38 OR S39 OR S40 OR S41 OR S42 OR S43 OR S44 OR S45 |
| S47 | S21 OR S46                                                                                                                                                           |
| S48 | (MH "Alzheimer disease")                                                                                                                                             |
| S49 | TI Alzheimer's disease                                                                                                                                               |
| S50 | AB Alzheimer's disease                                                                                                                                               |
| S51 | (MH "Dementia+")                                                                                                                                                     |
| S52 | TI Dementia                                                                                                                                                          |
| S53 | AB Dementia                                                                                                                                                          |
| S54 | S48 OR S49 OR S50 OR S51 OR S52 OR S53                                                                                                                               |
| S55 | S47 AND S54                                                                                                                                                          |

Note. Apply equivalent subjects; Search modes - Boolean/Phrase; AB= search in abstract field; TI = search title field; MH = Index Term field

**Google Advanced search**

| <b>Search line</b>                  | <b>Index/keyword/combinations</b>                                                                                                                                |
|-------------------------------------|------------------------------------------------------------------------------------------------------------------------------------------------------------------|
| <b>S1 All these words</b>           | Adverse childhood experiences Alzheimer's disease Dementia                                                                                                       |
| <b>S2 This exact word or phrase</b> | "Adverse childhood experiences" "Alzheimer's disease"                                                                                                            |
| <b>S3 Any of these words</b>        | Child OR Young OR Early OR Physical OR Emotion OR Sexual OR Abuse OR Neglect OR Divorce OR Domestic OR violence OR Parental OR death OR crime OR alcohol OR drug |
